# Supplementary material for: Electrophysiological Abnormalities in VLCAD Deficient hiPSC-Cardiomyocytes Can Be Improved by Lowering Accumulation of Fatty Acid Oxidation Intermediates
Source: PubMed Central journal article supplement (PMC7177397; doi:10.3390/ijms21072589), 2020-04-08
Supplement: ijms-21-02589-s001.pdf [file ijms-21-02589-s001.pdf]

**Supplementary Table 1** Primer sequences pluripotency markers

| Primer | Primer forward             | Primer reverse                 | Length (bps) |
|--------|----------------------------|--------------------------------|--------------|
| hGAPDH | AGAGGCAGGGATGATGTTCT       | TCTGCTGATGCCCCCATGTT           | 258          |
| hSOX2  | ATG CAC CGC TAC GAC GTG A  | CTT TTG CAC CCC TCC CAT TT     | 437          |
| hGDF3  | TTCGCTTTCTCCCAGACCAAGGTTTC | TACATCCAGCAGGTTGAAGTGAACAGCACC | 311          |
| hOCT4  | GACAACAATGAAAATCTTCAGGAGA  | TTCTGGCGCCGGTTACAGAACCA        | 218          |
| hFOXD3 | GTGAAGCCGCCTTACTCGTAC      | CCGAAGCTCTGCATCATGAG           | 353          |
| hLIN28 | AGTAAGCTGCACATGGAAGG       | ATTGTGGCTCAATTCTGTGC           | 410          |
| hNANOG | AGTCCCAAAGGCAAACAACCCACTTC | ATCTGCTGGAGGCTGAGGTATTTCTGTCTC | 164          |

**Supplementary Table 2** Primer sequences for rt-PCT germ layer markers

| Primer          | Primer forward             | Primer reverse                 | Length (bps) |
|-----------------|----------------------------|--------------------------------|--------------|
| hNANOG          | AGTCCCAAAGGCAAACAACCCACTTC | ATCTGCTGGAGGCTGAGGTATTTCTGTCTC | 164          |
| hAFP            | ACTCCAGTAAACCCTGGTGTG      | GAAATCTGCAATGACAGCCTCA         | 255          |
| hALB            | CCTTTGGCACAATGAAGTGGGTAACC | CAGCAGTCAGCCATTTACCATAGG       | 355          |
| h $\alpha$ -MHC | GTCATTGCTGAAACCGAGAATG     | GCAAAGTACTGGATGACACGCT         | 413          |
| hCTNT           | GACAGAGCGGAAAAGTGGGA       | TGAAGGAGGCCAGGCTCTAT           | 305          |
| hTH             | GCGGTTTATTGGGCGCAGG        | CAAACACCTTCACAGCTCG            | 215          |
| hGAPDH          | AGAGGCAGGGATGATGTTCT       | TCTGCTGATGCCCCCATGTT           | 258          |

### Supplementary Table 3 List of antibodies

#### Primary antibodies

| Antigen              | Host            | Dilution   | Blocking        | Provider             |
|----------------------|-----------------|------------|-----------------|----------------------|
| AFP                  | Rabbit (IgG)    | IF: 1:100  | IF: 1% BSA/DPBS | Dako #A0008-4oC      |
| LIN28                | Goat (IgG)      | IF: 1:300  | IF: 1% BSA/DPBS | R&D systems #AF3757  |
| NANOG                | Goat (IgG)      | IF: 1:200  | IF: 1% BSA/DPBS | Abcam #PA5-18406     |
| OCT4                 | Goat (IgG)      | IF: 1:40   | IF: 1% BSA/DPBS | R&D systems #AF1759  |
| SOX2                 | Mouse (IgG)     | IF: 1:50   | IF: 1% BSA/DPBS | R&D systems #MAB2018 |
| SSEA-4               | Mouse (IgG)     | IF: 1:200  | IF: 1% BSA/DPBS | Abcam #MC813         |
| $\alpha$ -SMA        | Mouse (IgG2A)   | IF: 1:3000 | IF: 1% BSA/DPBS | Sigma-Aldrich #A2547 |
| $\beta$ -III-TUBULIN | Mouse (IgG2A/K) | IF: 1:2000 | IF: 1% BSA/DPBS | Covance #MMS-435P    |

$\alpha$ -SMA:  $\alpha$ - smooth muscle actin, SSEA4: stage-specific embryonic antigen 4

### Supplementary Table 4

#### Secondary antibodies

| Fluorophore & Antigen      | Host           | Dilution | Company                             |
|----------------------------|----------------|----------|-------------------------------------|
| Alexa Fluor 488-anti-mouse | Donkey (IgG)   | 1:1000   | Thermo Fisher Scientific #A21202    |
| Alexa Fluor 555-anti-goat  | Donkey (IgG)   | 1:1000   | Thermo Fisher Scientific #A21432    |
| Cy3-anti-mouse             | Goat (IgG+IgM) | 1:300    | Jackson ImmunoResearch #115-165-068 |
| Cy3-anti-rabbit            | Goat (IgG)     | 1:600    | Jackson ImmunoResearch #111-165-003 |
| FITC-anti-mouse            | Goat (IgM)     | 1:100    | Jackson ImmunoResearch #115-096-072 |

**Figure S1**

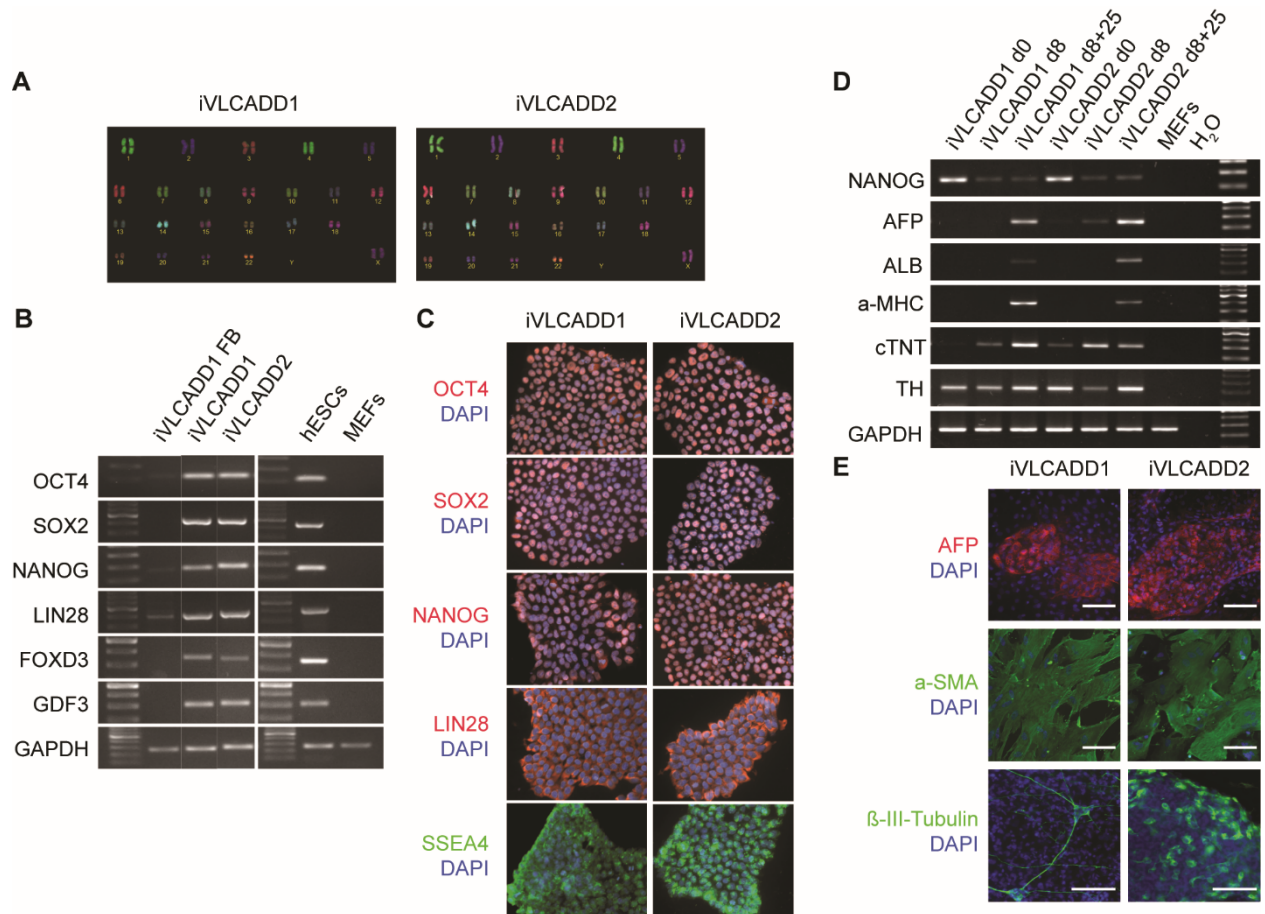

**Figure S1: Pluripotency characterization of patient-specific iPSC lines generated from dermal fibroblasts.** A. Karyotype of lines iVLCADD1 and iVLCADD2 analyzed by COBRA<sup>53</sup>. B. Expression of endogenous pluripotency markers (*OCT4*, *SOX2*, *NANOG*, *LIN28*, *FOXD3*, *GDF3*) in human iPSC lines (iVLCADD1; iVLCADD2) compared to primary fibroblasts (iVLCADD1 FBs) assessed by reverse transcriptase-PCR; human embryonic stem cells (hESCs) were used as positive control; mouse embryonic fibroblasts (MEFs) were used as negative control. C. Immunofluorescence staining for pluripotency markers (*OCT4*, *SOX2*, *NANOG*, *LIN28*, *SSEA4*); DNA is stained with DAPI (blue); scale bar, 100  $\mu$ m. D. Transcript expression of characteristic genes of different germ layers: AFP (alpha-fetoprotein) and ALB (albumin) for endoderm,  $\alpha$ -MHC (alpha-myosin heavy chain) and cTNT (cardiac troponin T) for mesoderm, TH (tyrosin hydroxylase) for ectoderm during spontaneous differentiation of the two iVLCADD1 and iVLCADD2 lines at day 8 and day 33 of differentiation. MEFs are used as negative control. E. Immunofluorescence staining for AFP (endoderm),  $\alpha$ -SMA (alpha smooth muscle actin, for mesoderm),  $\beta$ -III-tubulin (neuroectoderm) in both hiPSC lines. Scale bar, 100  $\mu$ m.

**Figure S2**

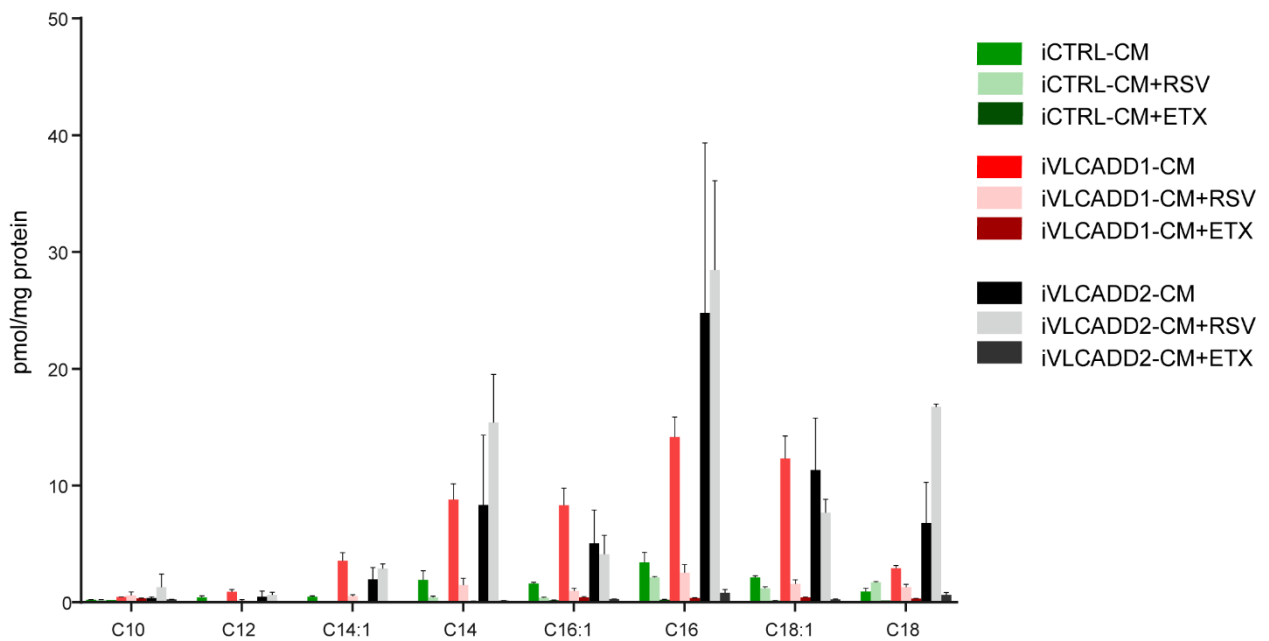

**Figure S2: Different long-chain acyl-carnitine species measured in the hiPSC-CMs.** Intracellular acylcarnitine levels in iVLCADD1-CMs, iVLCADD2-CMs, and iCTRL-CMs after etomoxir (ETX), resveratrol (RSV) or vehicle (DMSO) incubation for 96 hours. Acylcarnitines were measured in cell pellets and normalized for total amount of protein. The x-axis shows the different acylcarnitine carbon chain lengths that were measured. Values are presented as the mean of two biological replicates with SD.

**Figure S3**

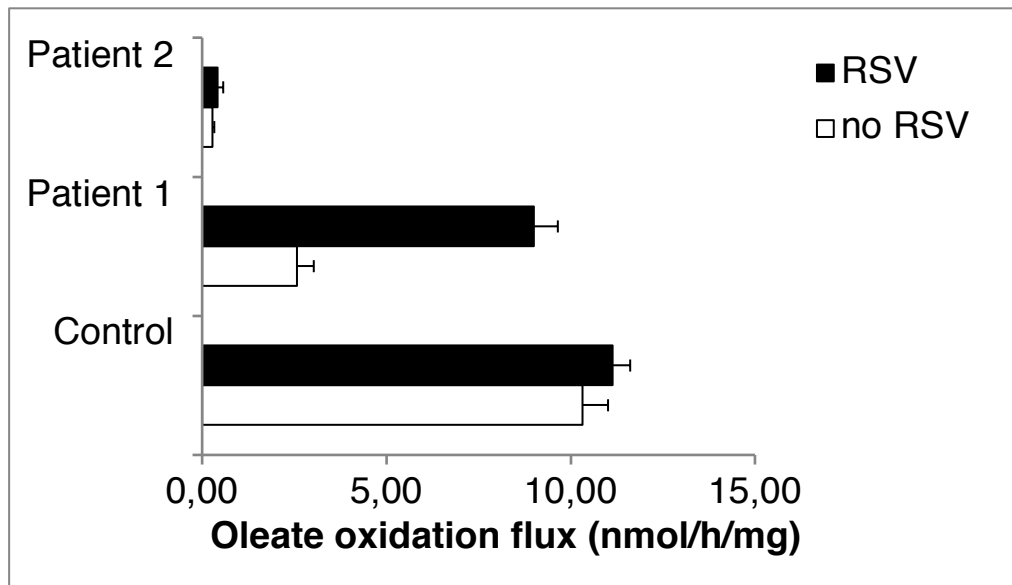

**Figure S3.** Long-chain fatty acid oxidation flux measured in cultured fibroblast of Patient 1 and Patient 2 and two healthy controls incubated with or without resveratrol (RSV) in the medium. RSV increases lcFAO flux in Patient 1 (carrying missense mutation and 3-bp deletion) but not in Patient 2 (homozygous for deletion mutation)
